# Supplementary material for: Synthesis and Anti-Inflammatory Activity of 1-Methylhydantoin Cinnamoyl Imides
Source: MDPI journal article supplement (doi:10.3390/molecules27238481), 2022-12-02
Supplement: s1 [file s1]

# **Synthesis and Anti-inflammatory Activity of 1-Methylhydantoin Cinnamoyl Imides**

Shihan Wang,<sup>1</sup> Li Ji,<sup>1</sup> Dongxue Zhang,<sup>1</sup> Hongye Guo,<sup>2</sup> Yongsheng Wang<sup>2</sup> and Wei Li<sup>1,\*</sup>

<sup>1</sup>College of Chinese Medicinal Materials, Jilin Agricultural University, Changchun 130118, China

<sup>2</sup>School of Pharmaceutical Sciences, Jilin University, Changchun, Jilin 130021, China

\*Correspondence: liwei7727@126.com

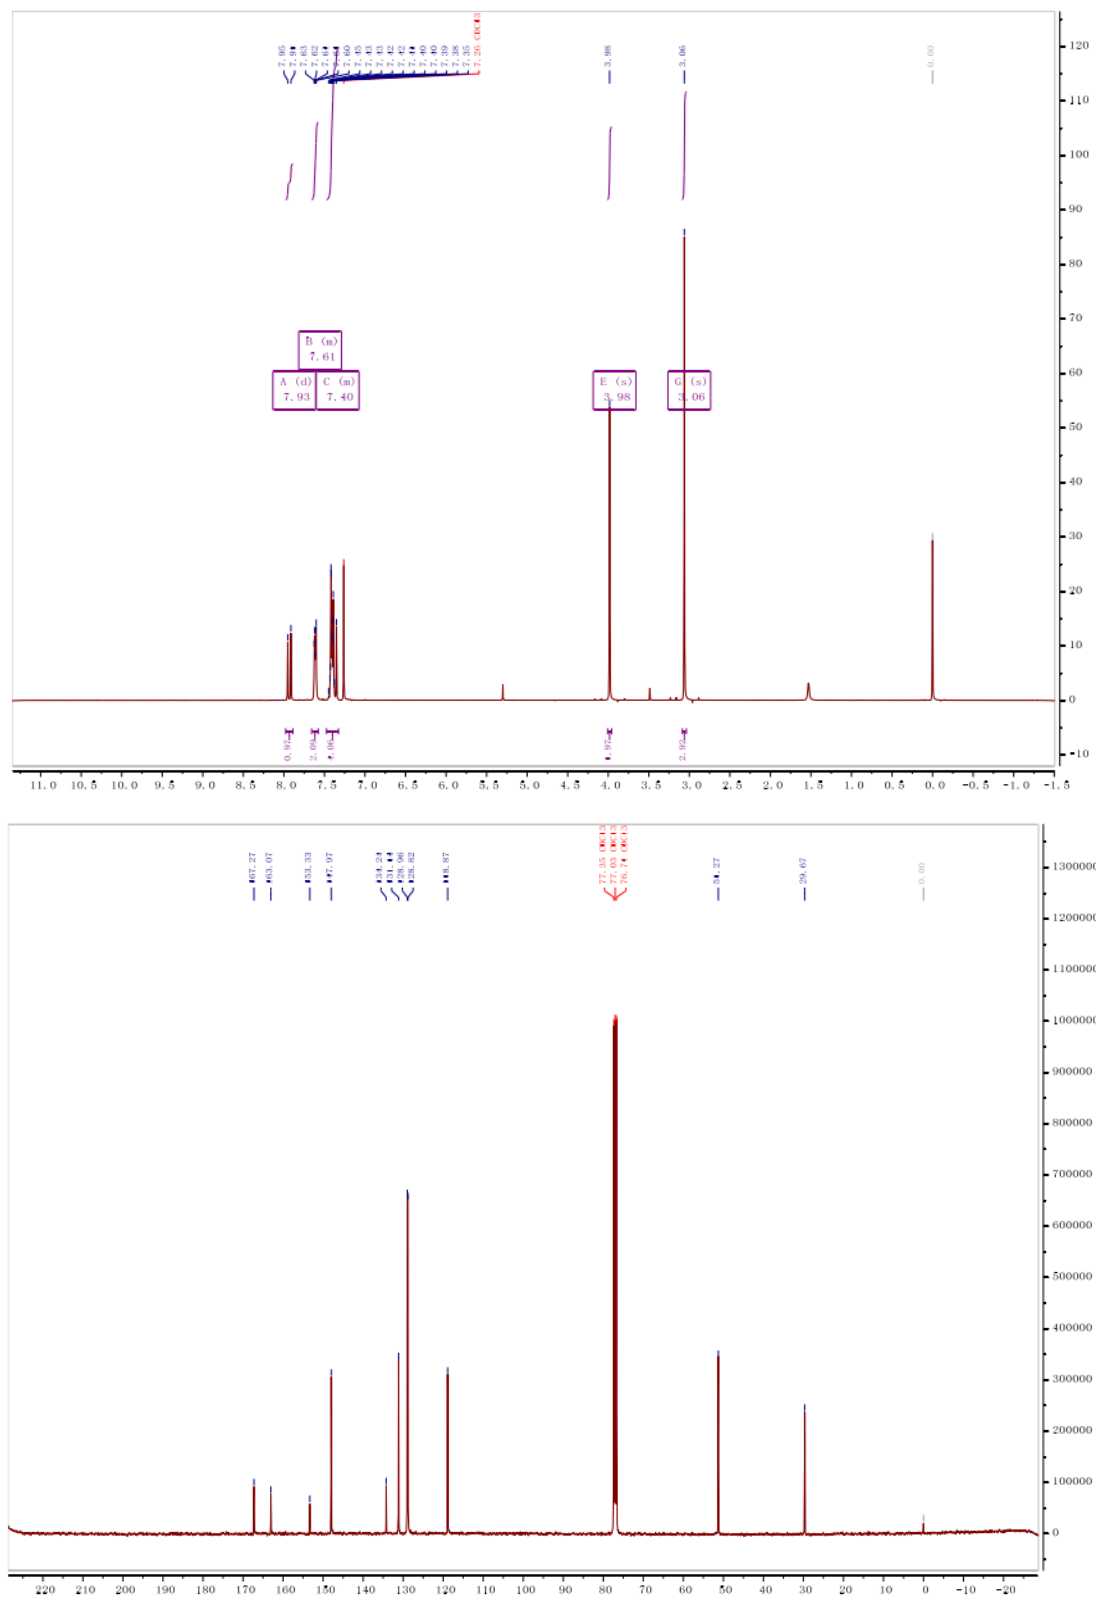

Figure S1 <sup>1</sup>H- and <sup>13</sup>C- NMR of compound **1**.

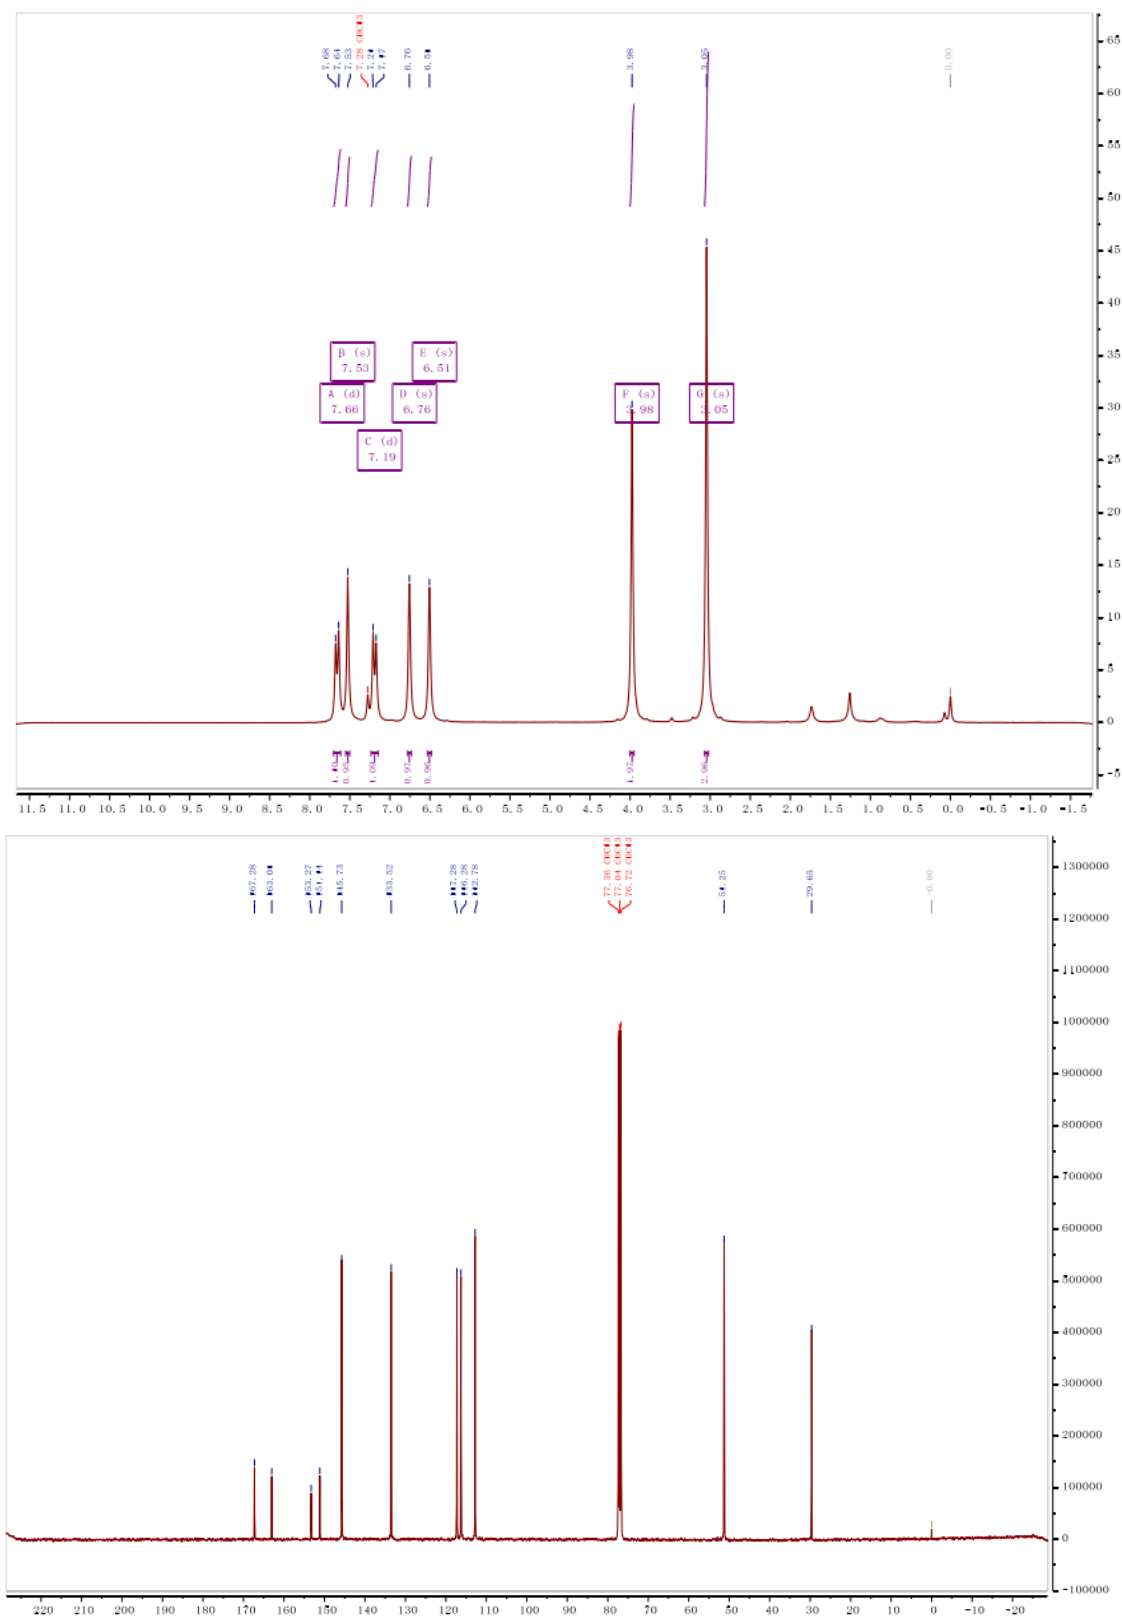

Figure S2 <sup>1</sup>H- and <sup>13</sup>C- NMR of compound **2**.

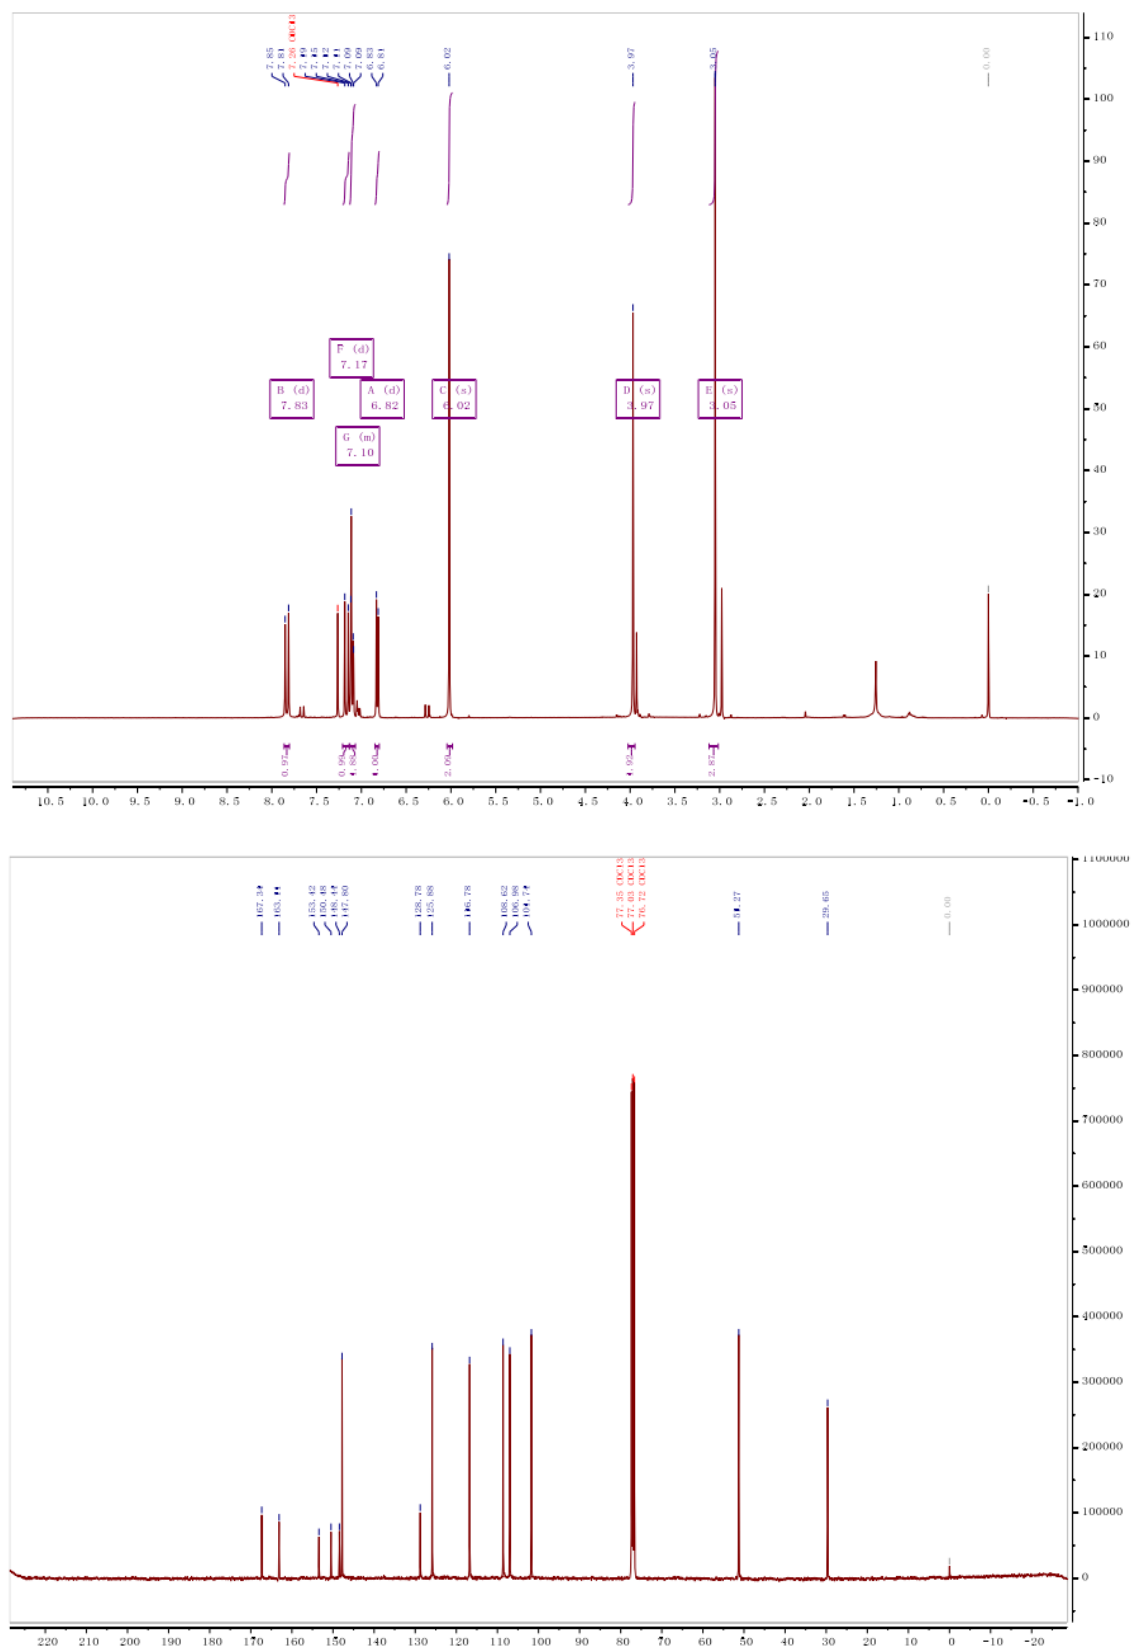

Figure S3 <sup>1</sup>H- and <sup>13</sup>C- NMR of compound **3**.

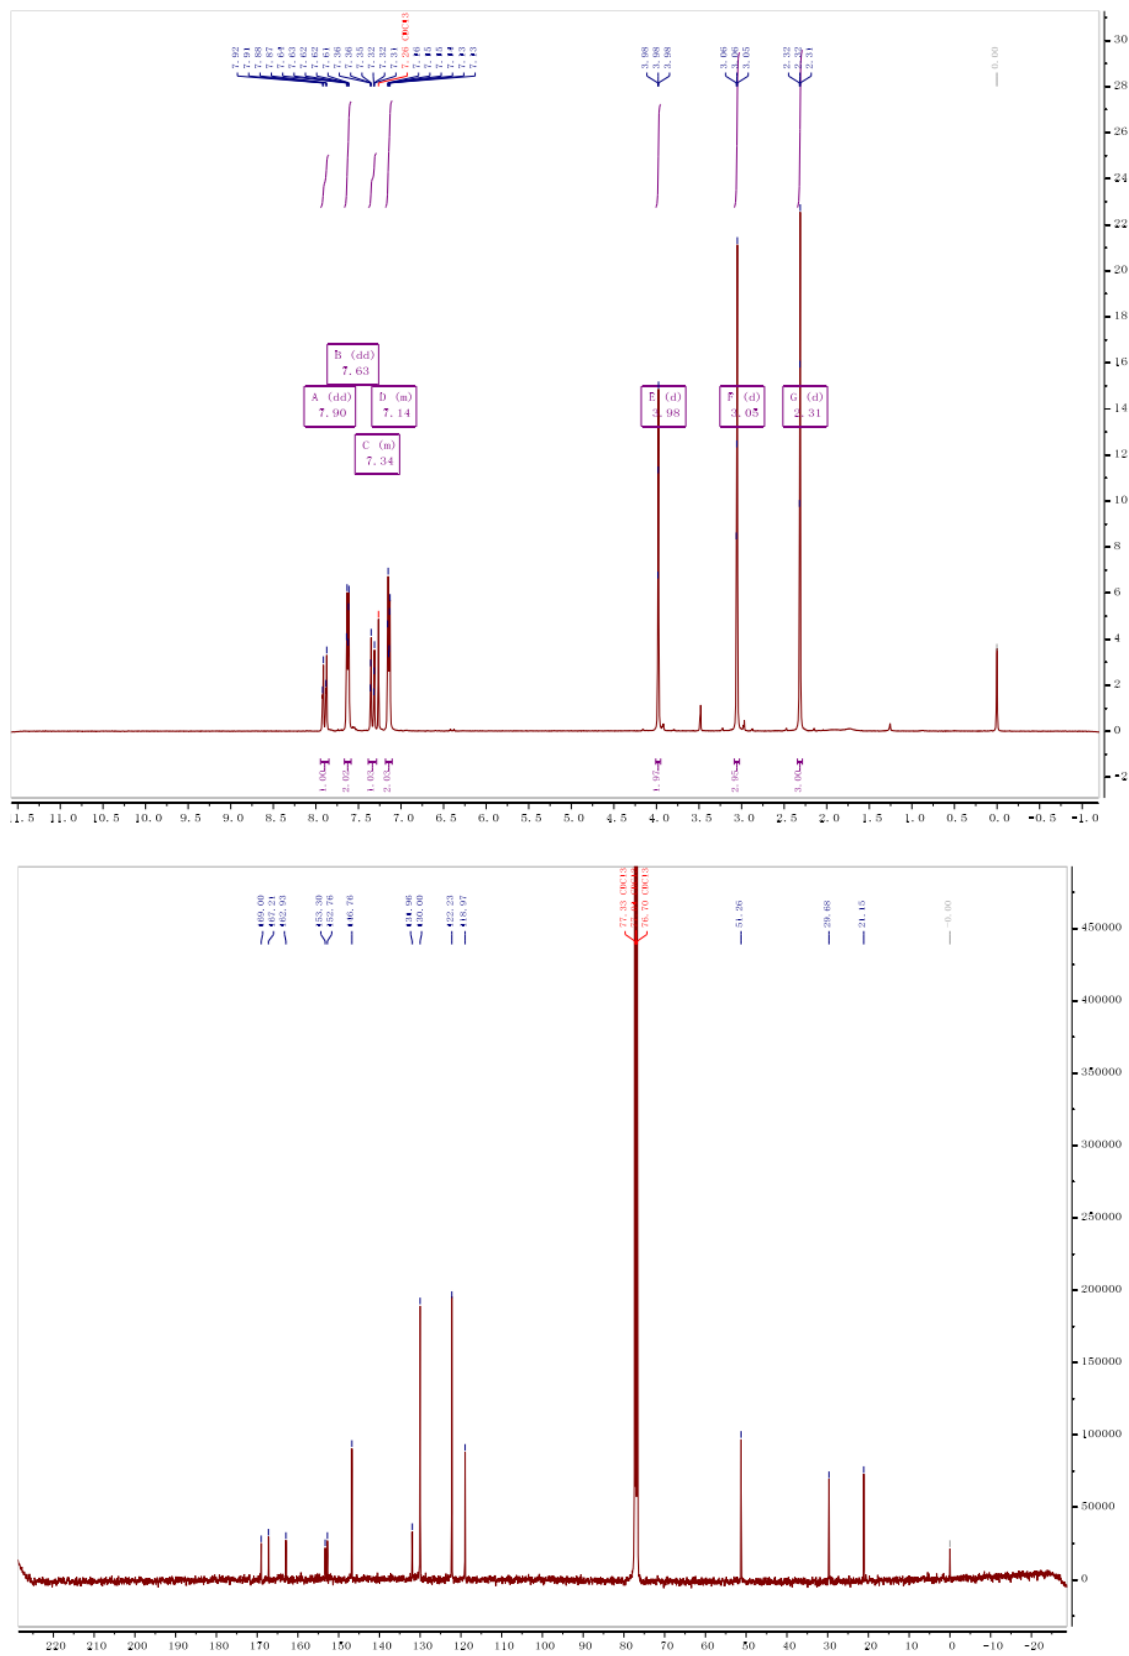

Figure S4 <sup>1</sup>H- and <sup>13</sup>C- NMR of compound **4**.

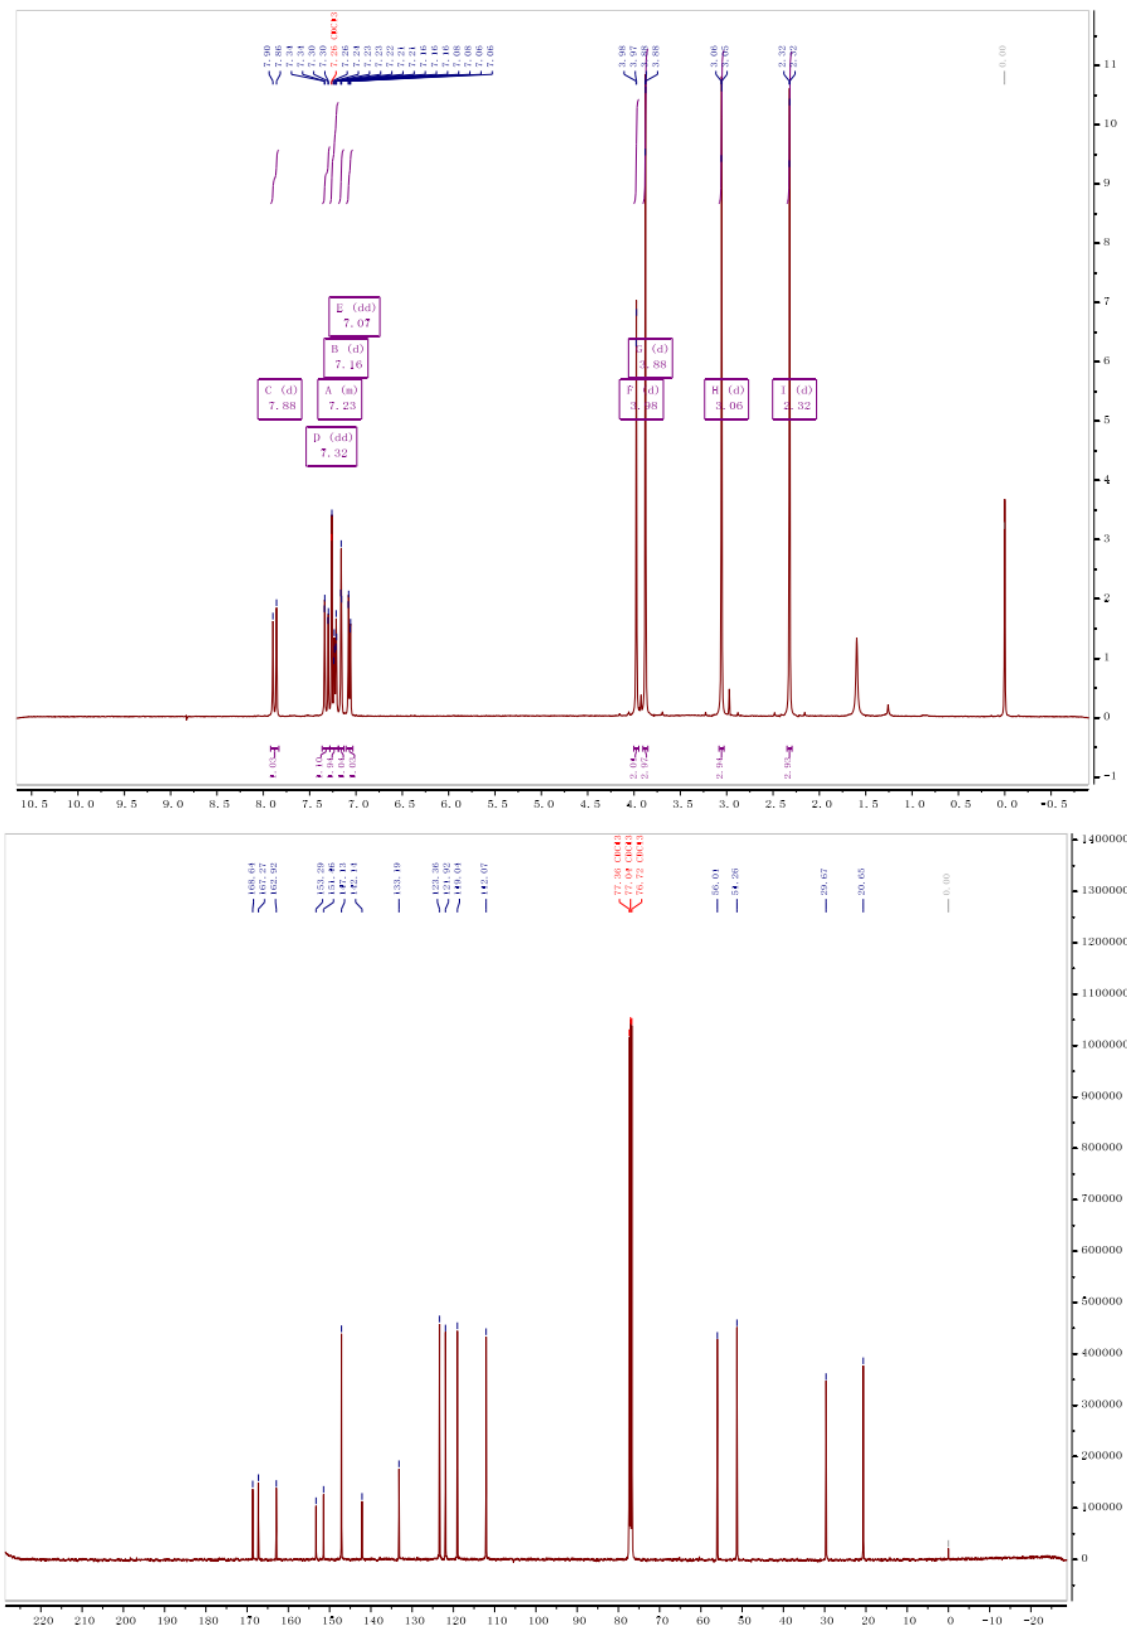

Figure S5 <sup>1</sup>H- and <sup>13</sup>C- NMR of compound **5**.
